# Supplementary material for: Ionic liquid-based chemodosimetric probe: the selective detection and removal of bisulfite from a pure aqueous system and potential uses in biosensing
Source: Royal Society of Chemistry journal article supplement (doi:10.1039/d4ma00198b), 2024-01-01
Supplement: d4ma00198b1.pdf [file d4ma00198b1.pdf]

## Supporting Information

### **Ionic liquid-based chemodosimeter probe for selective detection and removal of bisulfite in pure aqueous system, with potential uses in biosensing†**

Nishu Choudhary,<sup>ab</sup> Sanjay Yadav,<sup>ab</sup> Surjit Bhai,<sup>bc</sup> Vasavdutta Sonpal,<sup>bc</sup> Bishwjit Ganguly<sup>\*bc</sup> and Alok Ranjan Paital<sup>\*ab</sup>

| <b>S. No.</b> | <b>Content</b>                                                                                                                                                        | <b>Page No.</b> |
|---------------|-----------------------------------------------------------------------------------------------------------------------------------------------------------------------|-----------------|
| 1.            | <sup>1</sup> H, <sup>13</sup> C NMR, mass spectra, and DSC of TSIL-1 (Fig. S1-S4)                                                                                     | S2-S3           |
| 2.            | <sup>1</sup> H, <sup>13</sup> C NMR and mass spectra of TSIL-2 (Fig. S5-S8)                                                                                           | S4-S5           |
| 3.            | Emission intensity plot of TSIL-1 with bisulfite at different time and pH (Fig. S9). TCSPC experiment of TSIL-1 before and after the addition of bisulfite (Fig. S10) | S6              |
| 4.            | <sup>1</sup> H NMR and Mass spectrum of TSIL-1 with bisulfite (Fig. S11-S12)                                                                                          | S7              |
| 5.            | Mass spectrum of TSIL-2 with bisulfite (Fig. S13)                                                                                                                     | S8              |
| 6.            | <sup>1</sup> H NMR of the dried organic phase after extraction and after the third recycling experiment (Fig. S14-S15)                                                | S9              |
| 7.            | Real sample quantification of granulated sugar and crystal sugar with calibration plot (Fig. S16). Performance comparison of the probe (Table S1).                    | S10-S11         |

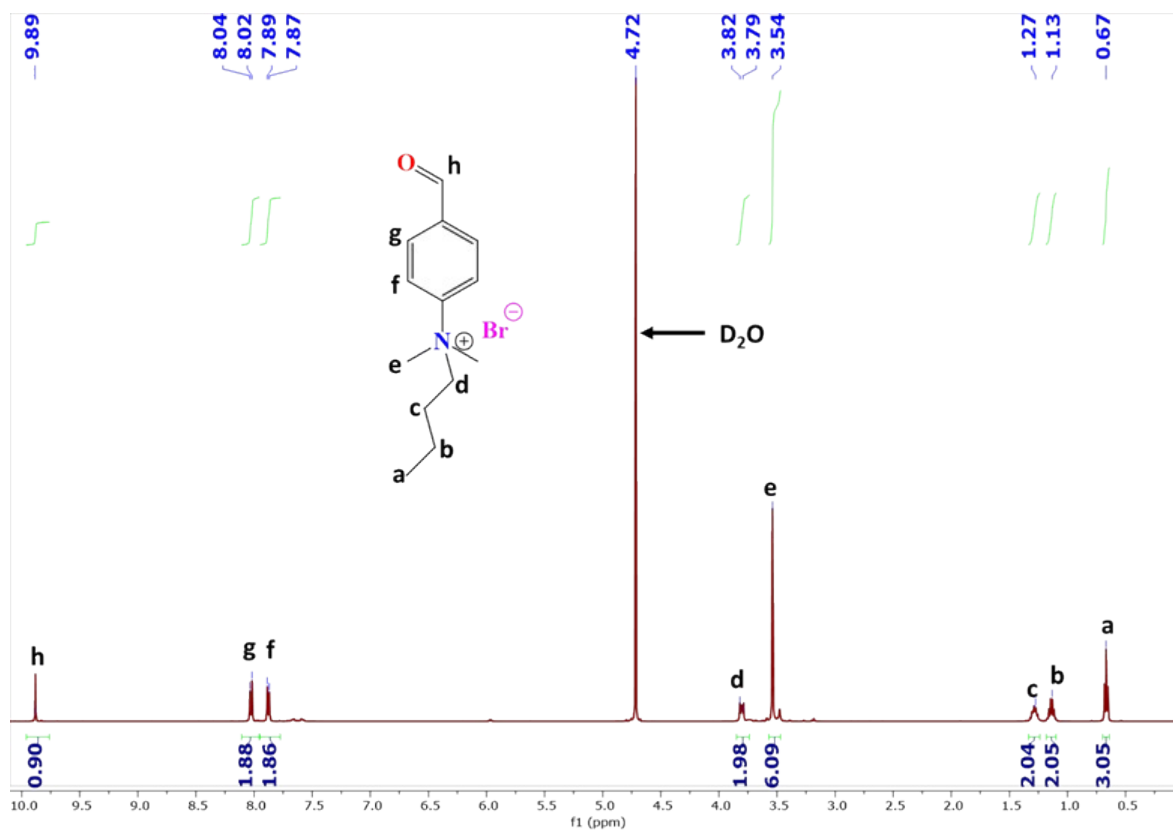

Fig. S1  $^1\text{H}$  NMR of hydrophilic TSIL-1 at 500 MHz in  $\text{D}_2\text{O}$  solvent.

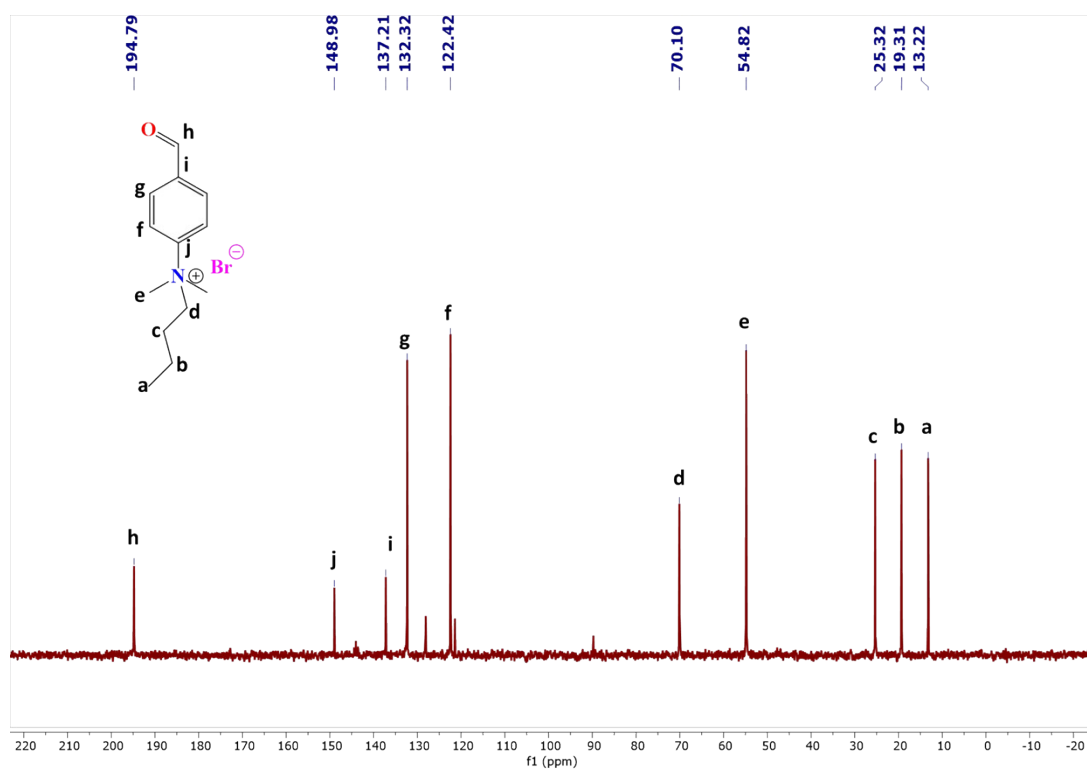

Fig. S2  $^{13}\text{C}$  NMR of hydrophilic TSIL-1 at 500 MHz in  $\text{D}_2\text{O}$  solvent.

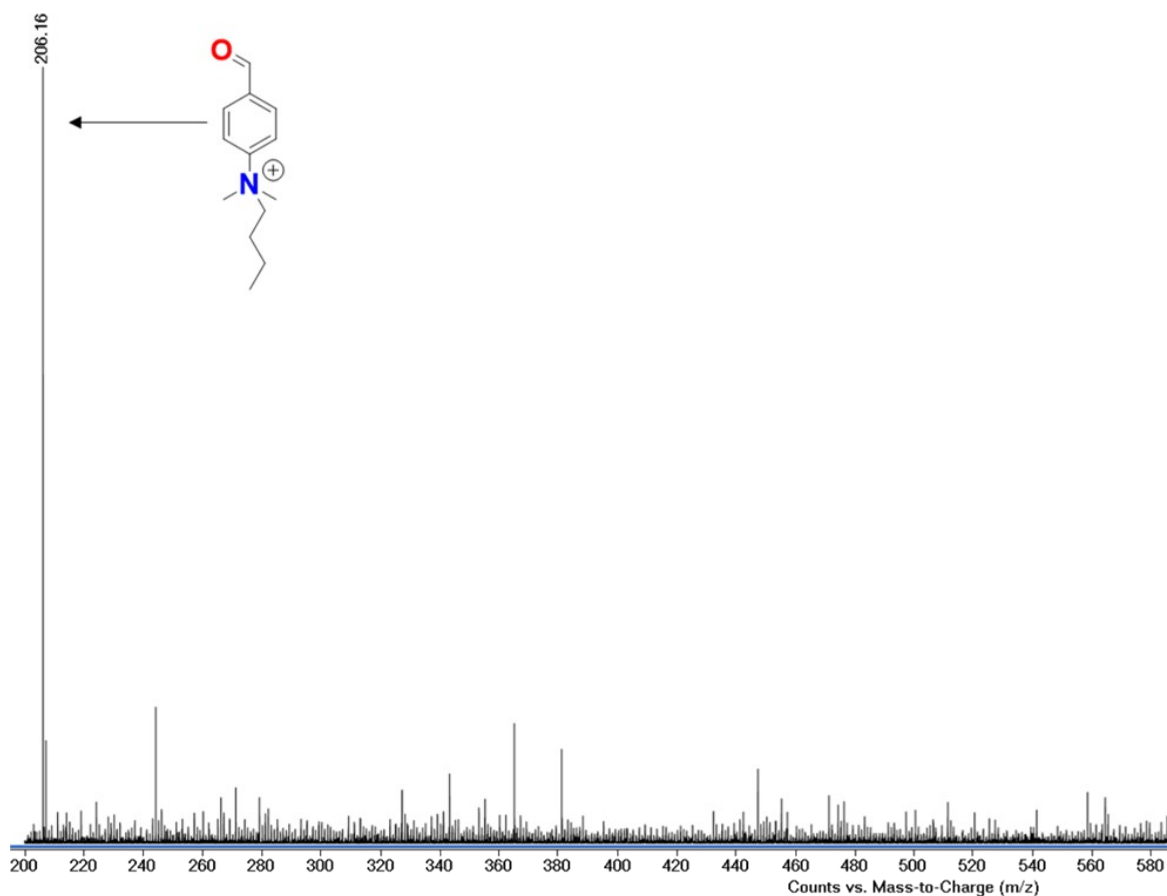

**Fig. S3** ESI-MS of TSIL-1 (+ve Scan).

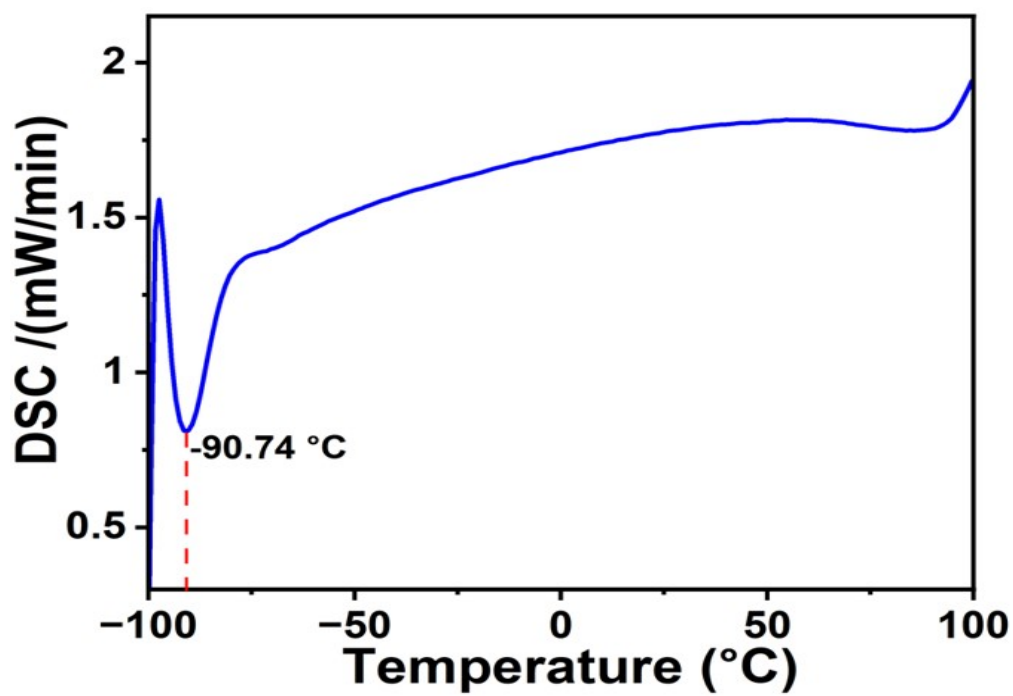

**Fig. S4** DSC profile of TSIL-1 showing room temperature ionic liquid behaviour (mp: -90 °C).

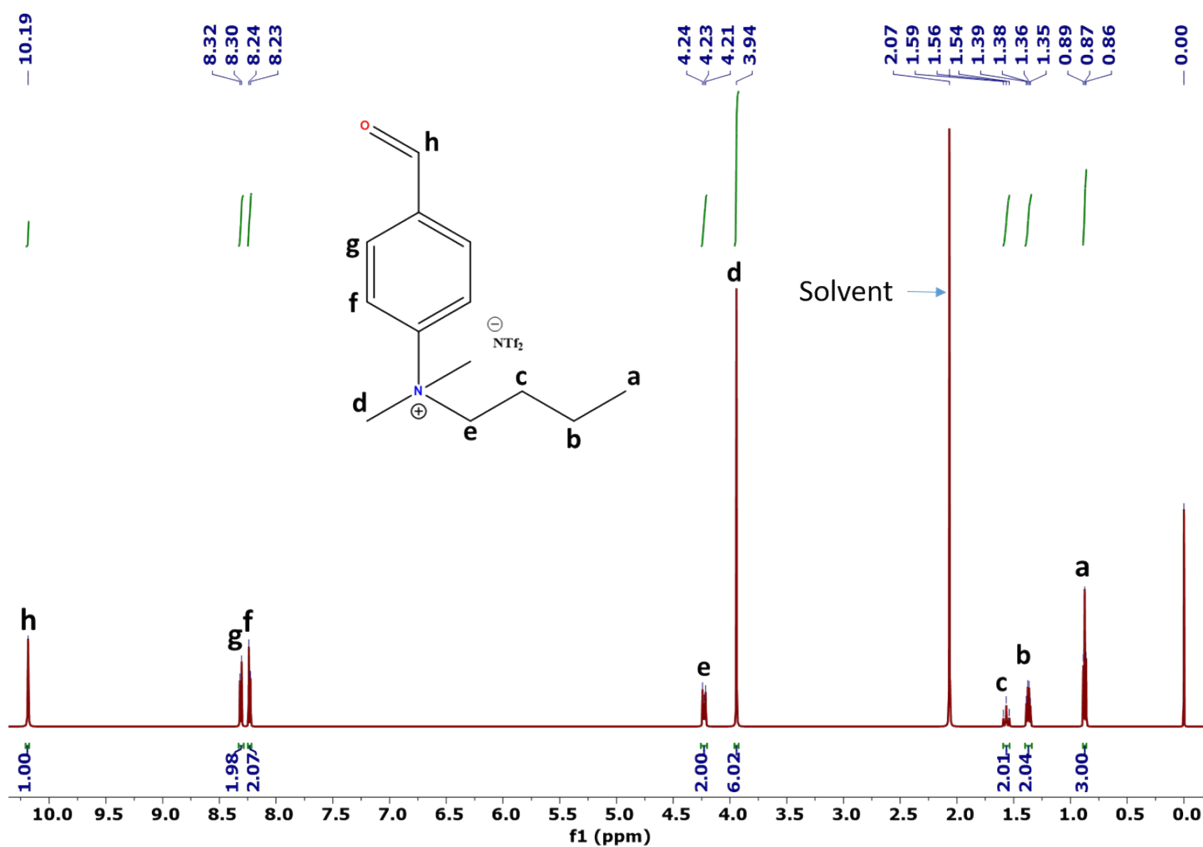

Fig. S5  $^1\text{H}$  NMR of hydrophobic TSIL-2 at 600 MHz in Acetone- $\text{d}_6$  solvent.

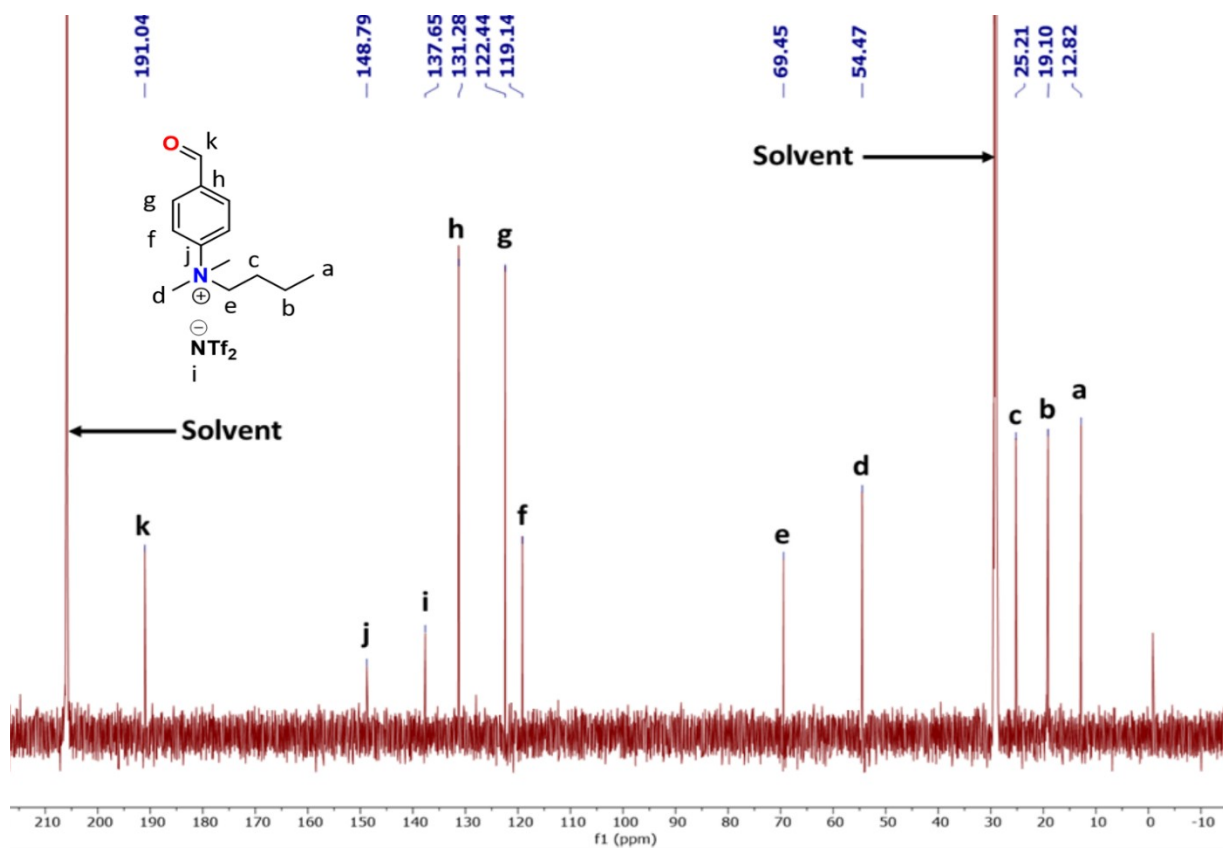

Fig. S6  $^{13}\text{C}$  NMR of hydrophobic TSIL-2 at 600 MHz in Acetone- $\text{d}_6$  solvent.

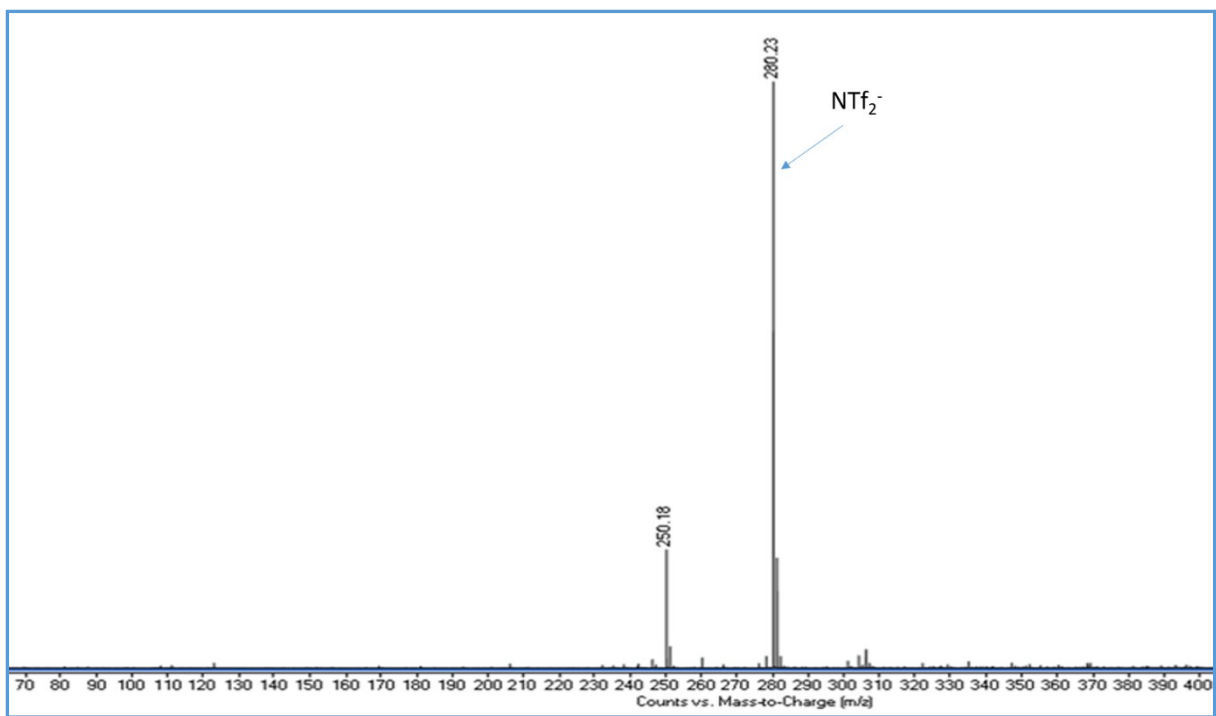

**Fig. S7** ESI-MS of TSIL-2 (-ve Scan).

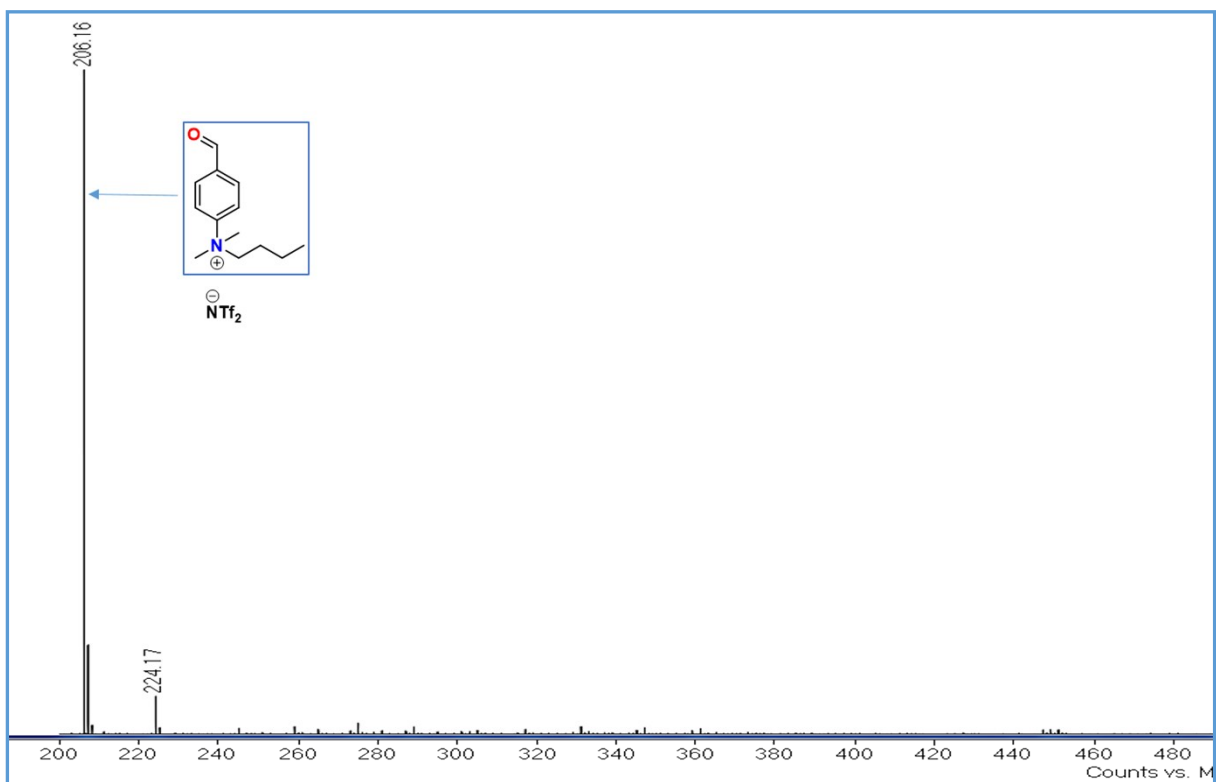

**Fig. S8** ESI-MS of TSIL-2 (+ve Scan).

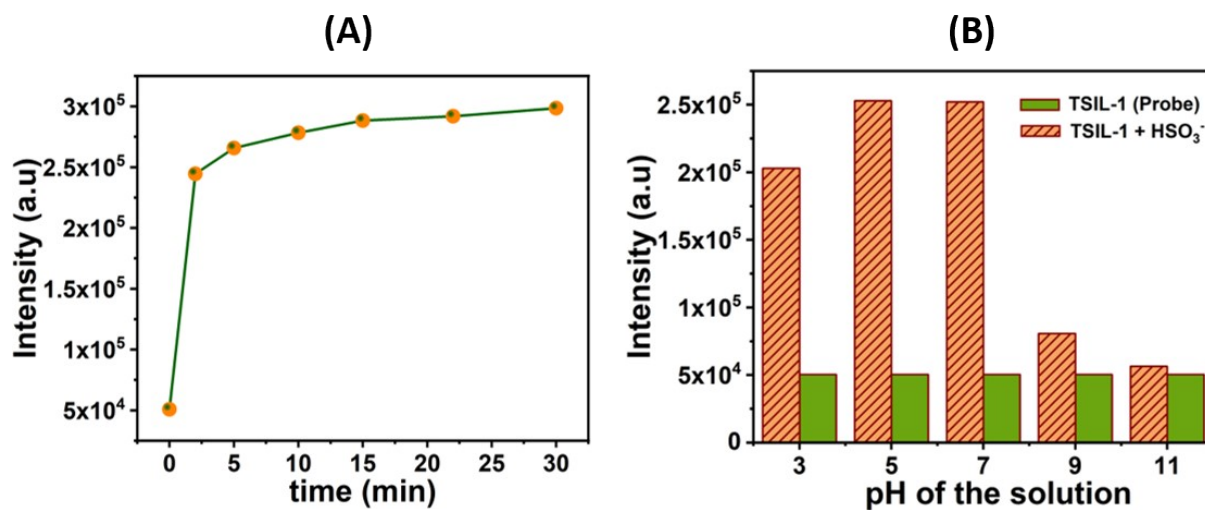

**Fig. S9** (A) The fluorescence intensity of the probe (TSIL-1) with addition of bisulfite over time (190  $\mu\text{M}$  bisulfite, pH  $\sim 7.2$ ); (B) The fluorescence emission of the probe (TSIL-1) with and without bisulfite at different pH.

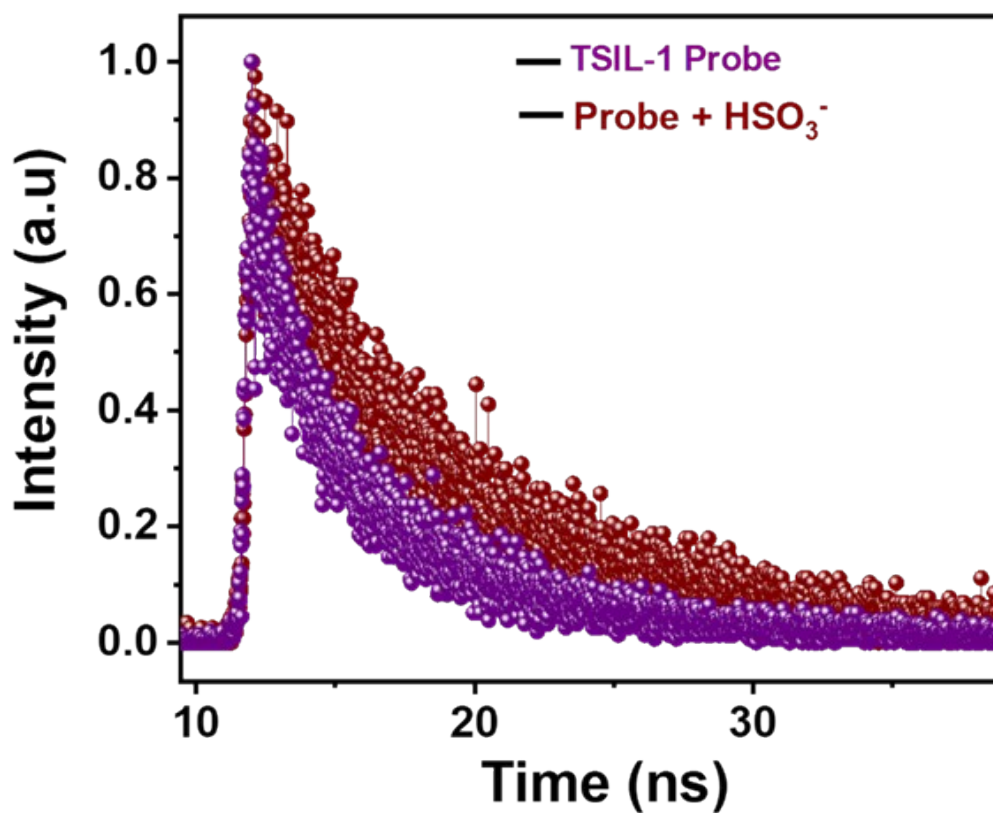

**Fig. S10** The time-correlated single photon counting (TCSPC) experiment of the probe material (TSIL-1) before and after bisulfite addition.

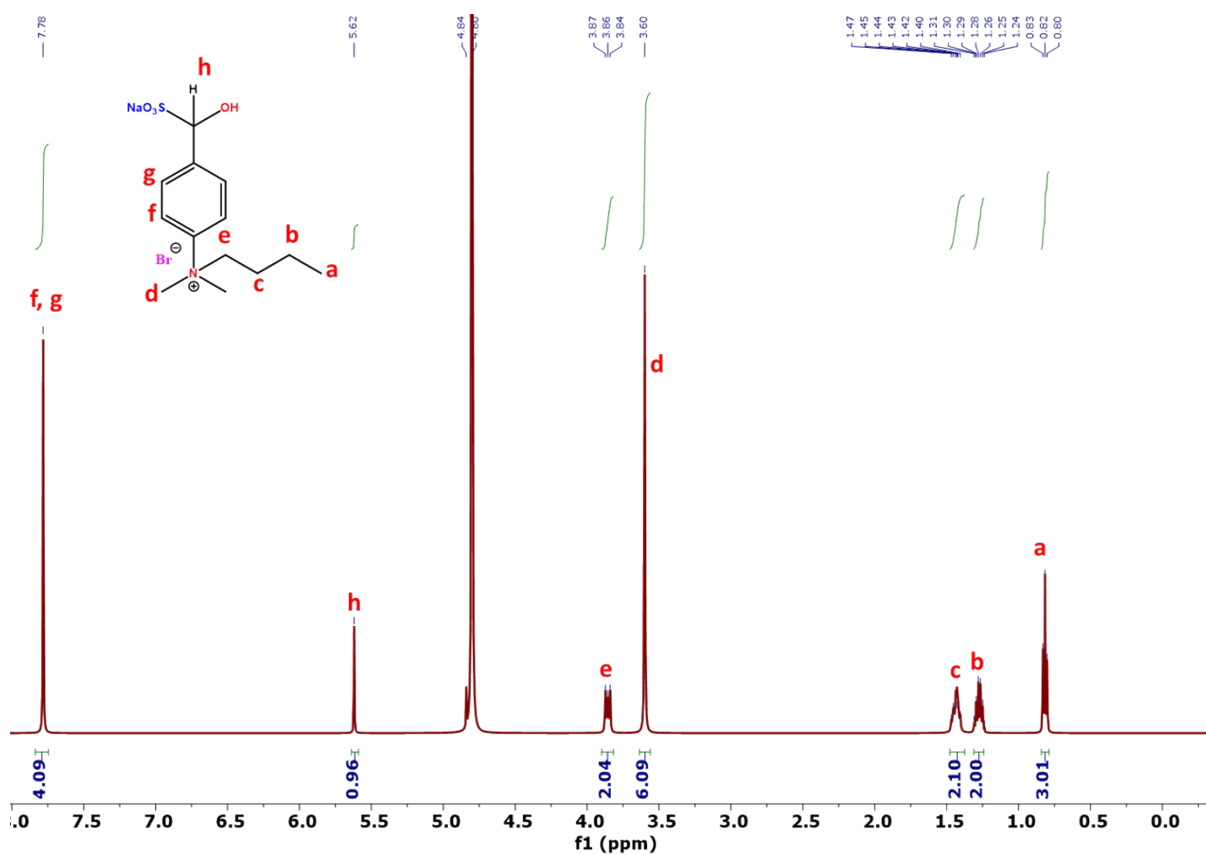

Fig. S11 <sup>1</sup>H NMR spectrum of TSIL-1 with NaHSO<sub>3</sub> in D<sub>2</sub>O.

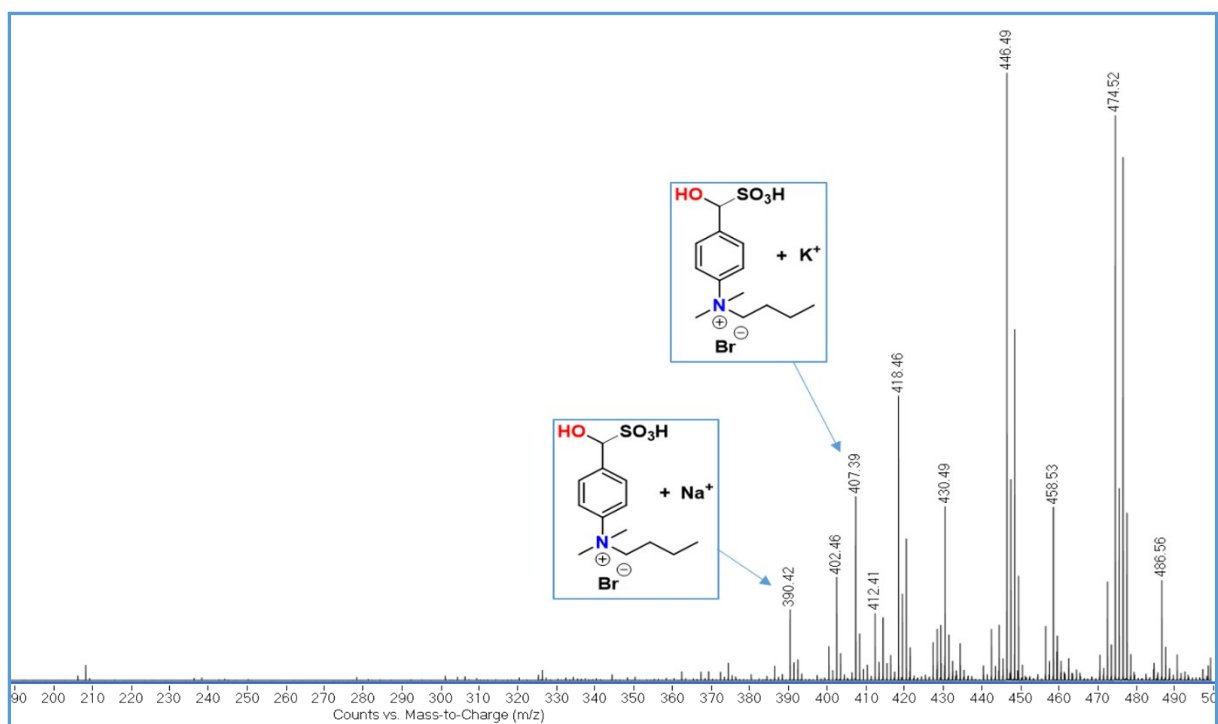

**Fig. S12** ESI-MS of TSIL-1 with NaHSO<sub>3</sub> in D<sub>2</sub>O (+ve Scan).

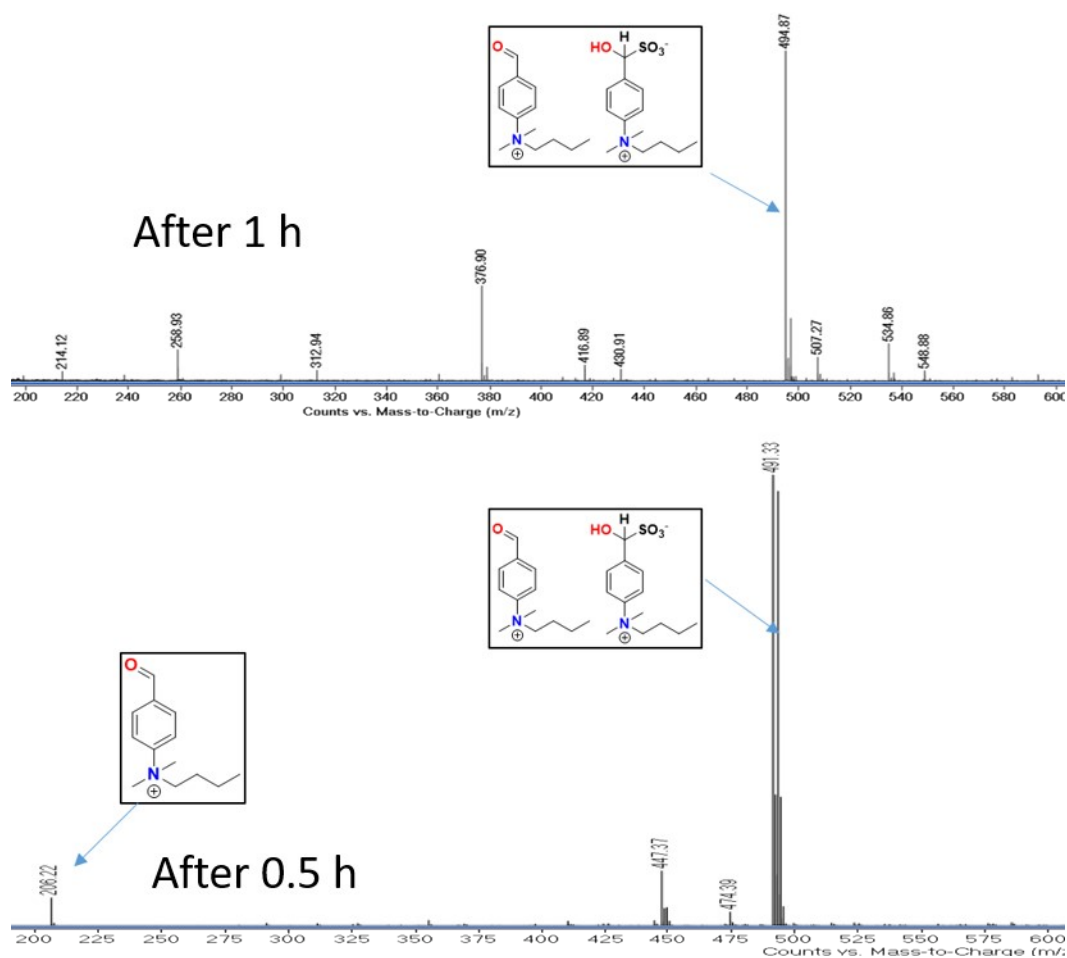

**Fig. S13** The mass spectrum of organic phase (TSIL-2 in ethylacetate) showing formation of bisulfite adduct with time.



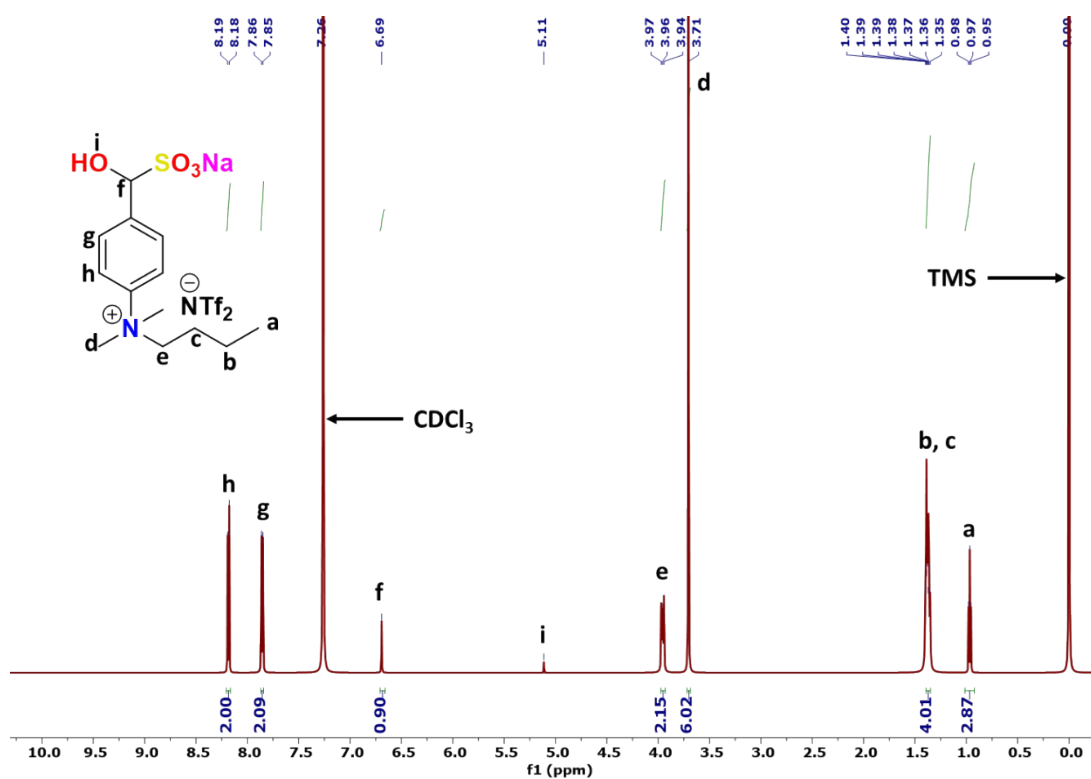

**Fig. S14** The dried organic phase from liquid-liquid extraction experiment showing formation of bisulfite adduct in CDCl<sub>3</sub>.

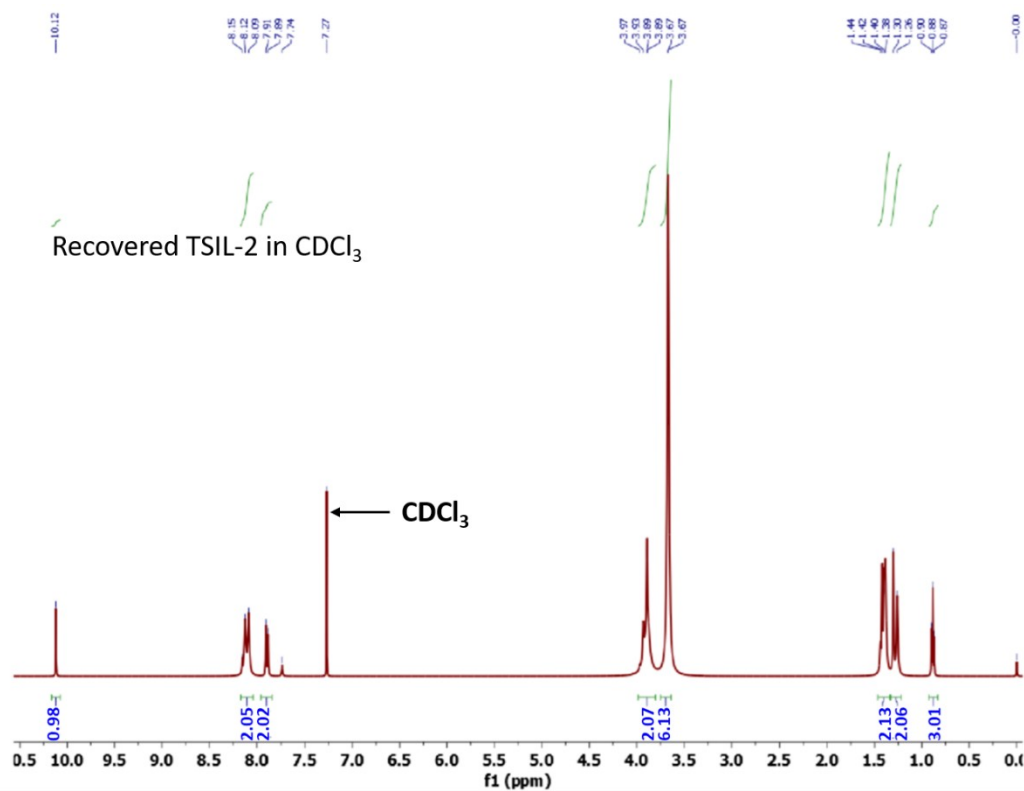

**Fig. S15** The dried organic phase from the third cycle of recycling experiment from liquid-liquid extraction experiment showing formation of bisulfite adduct in CDCl<sub>3</sub>.

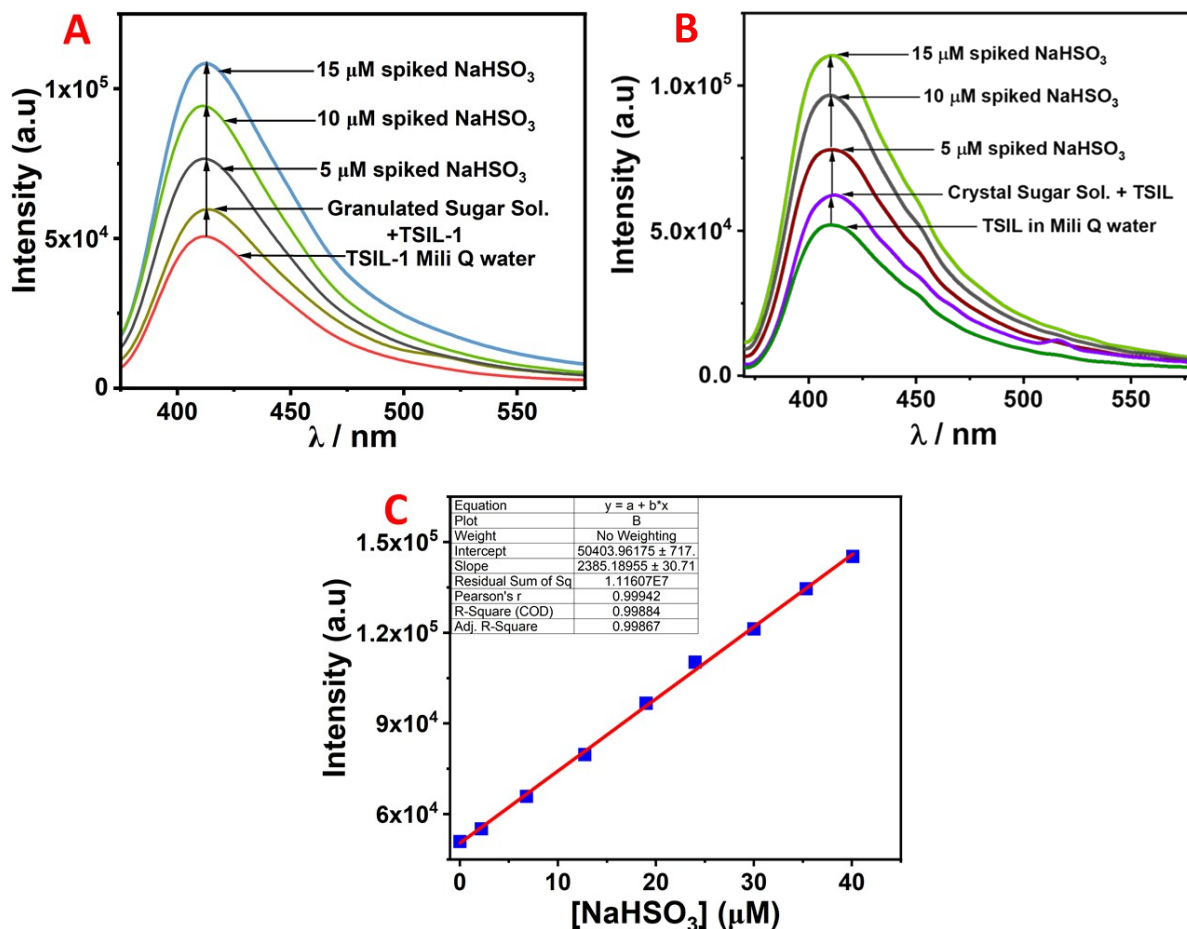

**Fig. S16** Real sample quantification of (A) Granulated sugar and (B) Crystal sugar; (C) Calibration plot.

**Table S1** Performance comparison of the probe with some literature reports.

| S.No | Probe                               | Type of response | Sensing Phase  | Removal Studies | L.O.D Value   | Ref  |
|------|-------------------------------------|------------------|----------------|-----------------|---------------|------|
| 1    | Functionalized silica               | Turn off         | Aqueous        | yes             | 64 ppb        | [8]  |
| 2    | Organic Probe                       | NIR              | Aqueous + DMSO | No              | 24 nM         | [10] |
| 3    | Benzopyranium Salt                  | Ratiometric      | Aqueous + EtOH | No              | 0.017 $\mu$ M | [2]  |
| 4    | Organic Probe                       | Ratiometric      | Aqueous + DMF  | No              | 12.6 nM       | [16] |
| 5    | Dicyanoisophorone-quinolinium-based | Ratiometric      | Aqueous + DMSO | No              | 2.5 $\mu$ M   | [18] |

|           |                                    |                |                        |            |              |                  |
|-----------|------------------------------------|----------------|------------------------|------------|--------------|------------------|
| 6         | Organic Salt                       | Turn off       | Aqueous + DMSO         | No         | 2.1 $\mu$ M  | [19]             |
| 7         | Coumarin-Benzopyran derivative     | Turn on        | Aqueous                | No         | 177 nM       | [20]             |
| 8         | Triphenylamine-Benzopyrylium based | Turn on        | Aqueous                | No         | 12.7 nM      | [21]             |
| 9         | Unsymmetrical azine                | Turn off       | Aqueous + organic      | No         | 25 nM        | [22]             |
| 10        | Organic probe                      | Ratiometric    | Aqueous + DMSO         | No         | 58 $\mu$ M   | [29]             |
| 11        | Organic Probe                      | Turn on        | Aqueous + Acetonitrile | No         | 10 $\mu$ M   | [30]             |
| <b>12</b> | <b>Ionic liquid (This work)</b>    | <b>Turn on</b> | <b>Aqueous</b>         | <b>Yes</b> | <b>91 nM</b> | <b>This work</b> |
